# Supplementary material for: Are Fusion Transcripts in Relapsed/Metastatic Head and Neck Cancer Patients Predictive of Response to Anti-EGFR Therapies?
Source: Hindawi journal article supplement (doi:10.1155/2017/6870614), 2017-01-01
Supplement: f1 [file 6870614.f1.pdf]

**Supplementary Table 1:**

| gene-fusion  | Category  | Chromosome location of the original genes | type of fusion                  | annotation of left partner                                                                                                                                                                                                    | annotations of right partner                                                                                                                                                                                                          | Fusion transcripts containing one/both identified fusion partners §             |              |
|--------------|-----------|-------------------------------------------|---------------------------------|-------------------------------------------------------------------------------------------------------------------------------------------------------------------------------------------------------------------------------|---------------------------------------------------------------------------------------------------------------------------------------------------------------------------------------------------------------------------------------|---------------------------------------------------------------------------------|--------------|
|              |           |                                           |                                 |                                                                                                                                                                                                                               |                                                                                                                                                                                                                                       | other cancers                                                                   | HNSCC        |
| METTL13/DNM3 | mRNA-mRNA | 1q24.3/1q24.3                             | intra-chromosomal               | METTL13 encodes for methyltransferase like 13 implicated in mRNA biogenesis, decay, and translation control.                                                                                                                  | DNM3 encodes for dynamin, a member of a family of guanosine triphosphate (GTP)-binding proteins that associate with microtubules and are involved in vesicular transport.                                                             | METTL13/EIF4G3<br>C1orf-9/DNM3                                                  | no           |
| RCSD1/MPZL1  | mRNA-mRNA | 1q24.2/1q24.2                             | intra-chromosomal               | RCSD1 encodes for RCSD domain containing 1 protein.                                                                                                                                                                           | MPZL1, also known as PZL, encodes for myelin protein zero like 1, an immunoglobulin superfamily protein that specifically binds tyrosine phosphatase SHP-2 through its intracellular immunoreceptor tyrosine-based inhibitory motifs. | ATP1B1/RCSD1;<br>MPZL1/PDE4DIP;<br>DCAF6/MPZL1                                  | no           |
| CTNNA2/HES1  | mRNA-mRNA | 2p12-3/3q29                               | inter-chromosomal translocation | CTNNA2 encodes for catenin alpha cell-cell adhesion molecule that may function as a linker between cadherin adhesion receptors and the cytoskeleton to regulate cell-cell adhesion and differentiation in the nervous system. | HES1 encodes for hes family bHLH transcription factor 1. The protein is a transcriptional repressor of genes that require a bHLH protein for their transcription.                                                                     | HIBCH/CTNNA2<br>PIGN/CTNNA2;<br>MRLP35/CTNNA2<br>POLR1A/CTNNA2                  | GLIS3/CTNNA2 |
| ZC3H15/ITGAV | mRNA-mRNA | 2q32.1/2q32.1                             | intra-chromosomal               | ZC3H15 encodes a potassium-dependent GTPase                                                                                                                                                                                   | ITGAV encodes the integrin subunit alpha V. The heterodimer consisting of alpha V and beta 3 subunits is also known as the vitronectin receptor. This integrin may regulate angiogenesis and cancer progression                       | ZC3H15/SERINC1<br>ZC3H15/CPS1;<br>ZC3H15/GULP1;<br>ITGAV/PDE11A;<br>ITGAV/FARP2 | no           |

|                     |             |                        |                                 |                                                                                                                                                                                                                                                                                                                                        |                                                                                                                                                                                                                                                               |                                           |    |
|---------------------|-------------|------------------------|---------------------------------|----------------------------------------------------------------------------------------------------------------------------------------------------------------------------------------------------------------------------------------------------------------------------------------------------------------------------------------|---------------------------------------------------------------------------------------------------------------------------------------------------------------------------------------------------------------------------------------------------------------|-------------------------------------------|----|
| FGF12/MB21D2        | mRNA-mRNA   | 3q28-q29/3q29          | intra-chromosomal               | FGF12 encodes fibroblast growth factor 12. FGF family members possess broad mitogenic and cell survival activities. This growth factor lacks the N-terminal signal sequence present in most of the FGF family members, but it contains clusters of basic residues that have been demonstrated to act as a nuclear localization signal. | MB21D2 encodes for Mab-21 domain containing 2                                                                                                                                                                                                                 | FGF12/SYN3; TSC22D2/FGF12; C1orf196/FGF12 | no |
| FLNB/ENSG0000245384 | mRNA-lncRNA | 3p14.3/4               | inter-chromosomal translocation | FLNB encodes a member of the filamin family, filamin b that interacts with glycoprotein Ib alpha as part of the process to repair vascular injuries.                                                                                                                                                                                   | antisense lnc-TET2-4                                                                                                                                                                                                                                          | FLNB/SLMAP; CCDC66/FLNB; ABHD6/FLNB       | no |
| C9/RCOR1            | mRNA-mRNA   | 5p13.1/14q32.31-q32.32 | inter-chromosomal translocation | C9 encodes for the final component of the complement system                                                                                                                                                                                                                                                                            | RCOR1 encodes a protein that is well-conserved, downregulated at birth, and with a specific role in determining neural cell differentiation. The encoded protein binds to the C-terminal domain of REST (repressor element-1 silencing transcription factor). | RICTOR/C9; LIFR/C9; FAM157A/C9            | no |
| RPS6KA2/RNAS ET2    | mRNA-mRNA   | 6q27/6q27              | intra-chromosomal               | RPS6KA2 encodes a member of the RSK (ribosomal S6 kinase) family of serine/threonine kinases. This kinase contains two non-identical kinase catalytic domains and phosphorylates various substrates, including members of the mitogen-activated kinase (MAPK) signalling pathway.                                                      | RNAS ET2 encodes a novel member of the Rh/T2/S-glycoprotein class of extracellular ribonucleases.                                                                                                                                                             | RPS6KA2/PSMG4                             | no |

|                      |                   |                 |                       |                                                                                                                                                                                                                                                                                                      |                                                                                                                                                                                                                                                                   |                                                                                                                                                                                                                                                                                 |    |
|----------------------|-------------------|-----------------|-----------------------|------------------------------------------------------------------------------------------------------------------------------------------------------------------------------------------------------------------------------------------------------------------------------------------------------|-------------------------------------------------------------------------------------------------------------------------------------------------------------------------------------------------------------------------------------------------------------------|---------------------------------------------------------------------------------------------------------------------------------------------------------------------------------------------------------------------------------------------------------------------------------|----|
| ANK1/KAT6A           | mRNA-<br>mRNA     | 8p11.21/8p11.21 | intra-<br>chromosomal | ANK1 encodes for ankirin 1, prototype of a family of proteins that link the integral membrane proteins to the underlying spectrin-actin cytoskeleton and play key roles in activities such as cell motility, activation, proliferation, contact and the maintenance of specialized membrane domains. | KAT6A encodes for lysine acetyltransferase 6A, a member of the MOZ, YBFR2, SAS2, TIP60 family of histone acetyltransferases that acts as a co-activator for several transcription factors                                                                         | ANK1/FUT10;<br>ANK1/ADAM7;<br>NECAP1/ANK1;<br>TMEM188/ANK1;<br>WHSC1L1/ANK1;<br>IKBKB/ANK1;<br>KIAA0146/ANK1;<br>PPFIA3/ANK1;<br>KAT6A/IKBKB;<br>KAT6A/CLK4;<br>KAT6A/MSR1;<br>KAT6A/ADAM2;<br>KAT6A/GOT1L1;<br>KAT6A/RAB11F1P1<br>FAM49B/KAT6A;<br>CHD7/KAT6A;<br>CREBBP/KAT6A | no |
| PVT1/ENSG00000253288 | lncRNA-<br>lncRNA | 8q24.21/8       | intra-<br>chromosomal | This gene represents a long non-coding RNA locus that has been identified as a candidate oncogene.                                                                                                                                                                                                   | intergenic LNC-<br>FAM135B-1:1                                                                                                                                                                                                                                    | no                                                                                                                                                                                                                                                                              | no |
| CD274/PDCD1LG2       | mRNA-<br>mRNA     | 9p24.1/9p24.1   | intra-<br>chromosomal | CD274 encodes for programmed death ligand 1, PD-L1, an immune inhibitory receptor ligand that is expressed by hematopoietic and non-hematopoietic cells, such as T cells and B cells and various types of tumor cells.                                                                               | PDCD1LG2 encodes for programmed cell death 1 ligand 2, PD-L2                                                                                                                                                                                                      | KIAA1432/PDCD1<br>LG2                                                                                                                                                                                                                                                           | no |
| MUSK/LPAR1           | mRNA-<br>mRNA     | 9q31.3/9q31.3   | intra-<br>chromosomal | MUSK encodes a muscle-specific tyrosine kinase receptor. The encoded protein may play a role in clustering of the acetylcholine receptor                                                                                                                                                             | LPAR1 encodes for a lysophosphatidic acid (LPA) receptor from a group known as EDG receptors that mediate diverse biologic functions, including proliferation, platelet aggregation, smooth muscle contraction, inhibition of neuroblastoma cell differentiation, | NAA15/LPAR1;<br>SNX30/LPAR1                                                                                                                                                                                                                                                     | no |

|             |           |                 |                                 |                                                                                                                                                                                                                                                                                                                                                         |                                                                                                                                                                                                                                                                          |                                                                                                                                                                                                   |           |
|-------------|-----------|-----------------|---------------------------------|---------------------------------------------------------------------------------------------------------------------------------------------------------------------------------------------------------------------------------------------------------------------------------------------------------------------------------------------------------|--------------------------------------------------------------------------------------------------------------------------------------------------------------------------------------------------------------------------------------------------------------------------|---------------------------------------------------------------------------------------------------------------------------------------------------------------------------------------------------|-----------|
|             |           |                 |                                 |                                                                                                                                                                                                                                                                                                                                                         | chemotaxis, and tumor cell invasion.                                                                                                                                                                                                                                     |                                                                                                                                                                                                   |           |
| DLG2/PICALM | mRNA-mRNA | 11q14.1/11q14.2 | intra-chromosomal               | DLG2 encodes for discs large MAGUK scaffold protein 2, a member of the membrane-associated guanylate kinase (MAGUK) family. The encoded protein forms a heterodimer with a related family member that may interact at postsynaptic sites to form a multimeric scaffold for the clustering of receptors, ion channels, and associated signaling proteins | PICALM encodes for phosphatidylinositol binding clathrin assembly protein that may be required to determine the amount of membrane to be recycled, possibly by regulating the size of the clathrin cage.                                                                 | LRP5/DLG2; ARRB1/DLG2; INPP5A/DLG2; PLXNB2/DLG2; PICALM/RP11-849H4.2; PICALM/MLLT10; MLLT10/PICALM; ARRB1/PICALM                                                                                  | no        |
| NUMA1/GRIA3 | mRNA-mRNA | 11q13.4/Xq25    | inter-chromosomal translocation | NUMA1 encodes for a large protein interacting with microtubules and playing a role in the formation and organization of the mitotic spindle during cell division.                                                                                                                                                                                       | GRIA3 encodes for glutamate ionotropic receptor AMPA type subunit 3. The subunit encoded by this gene belongs to a family of AMPA (alpha-amino-3-hydroxy-5-methyl-4-isoxazole propionate)-sensitive glutamate receptors, and is subject to RNA editing (AGA->GGA; R->G). | NUMA1/FAM83B; NUMA1/ADARB2; NUMA1/PTH; NUMA1/AATF; NUMA1/PIPTNM1; NUMA1/PPP2R5B; NUMA1/IQSEC3; NUMA1/TRPT1; NUMA1/ADHB12; NUMA1/CRYM; NUMA1/CCT5; SHANK2/NUMA1; STAG2/GRIA3                       | NUMA1/SFN |
| PPP6R3/MLL  | mRNA-mRNA | 11q13.2/11q23.3 | intra-chromosomal               | SAPS3 encodes for the phosphatase regulatory subunit 3 that modulates the activity of phosphatase-6 catalytic subunit by restricting substrate specificity, recruiting substrates, and determining the intracellular localization of the holoenzyme.                                                                                                    | MLL, also known as KMT2A lysine methyltransferase, encodes a transcriptional coactivator that plays an essential role in regulating gene expression during early development and hematopoiesis.                                                                          | PPP6R3/YAP1; PPP6R3/POLD3; PPP6R3/SSH2; PPP6R3/FADD; PPP6R3/SPTBN3; PPP6R3/MTL5; PPP6R3/LRP5; PPP6R3/ARHGAP1 RNF121/PPP6R3; KDM2A/PPP6R3; STRN3/PPP6R3; PC/PPP6R3; RAB11A/PPP6R3; CCDC132/PPP6R3; | no        |

|                       |             |                   |                                 |                                                                                                                                                                                                                                     |                                                                                                                                                                                                                                                                                                     |                                                                                                                                                          |                |
|-----------------------|-------------|-------------------|---------------------------------|-------------------------------------------------------------------------------------------------------------------------------------------------------------------------------------------------------------------------------------|-----------------------------------------------------------------------------------------------------------------------------------------------------------------------------------------------------------------------------------------------------------------------------------------------------|----------------------------------------------------------------------------------------------------------------------------------------------------------|----------------|
|                       |             |                   |                                 |                                                                                                                                                                                                                                     |                                                                                                                                                                                                                                                                                                     | MLL/ATP5L;<br>MLL/SLC22A10;<br>MLL/CD86;<br>MLL/MLLT10;<br>MLL/ELL;<br>MLL/MLLT4;<br>MLL/MLLT3;<br>MLL/IGHMBP2;<br>MLL/FYN;<br>MLL/ZDHHC7;<br>MLLT4/MLL; |                |
| ENSG00000231121/NAV3  | lncRNA-mRNA | 12/12q21.2        | intra-chromosomal               | lnc-NAV3                                                                                                                                                                                                                            | NAV3 belongs to the neuron navigator family and is expressed predominantly in the nervous system. The encoded protein contains coiled-coil domains and a conserved AAA domain characteristic for ATPases associated with a variety of cellular activities.                                          | CPSF6/NAV3;<br>PDK3/NAV3                                                                                                                                 | no             |
| ZMYM2/TRIM28          | mRNA-mRNA   | 13q12.11/19q13.43 | inter-chromosomal translocation | ZMYM2 encodes for zinc finger MYM-type containing 2, also named ZNF118 that may act as a transcription factor and be part of a BHC histone deacetylase complex.                                                                     | TRIM28 encodes tripartite motif containing 28 protein that mediates transcriptional control by interaction with the Kruppel-associated box repression domain found in many transcription factors. The protein localizes to the nucleus and is thought to associate with specific chromatin regions. | ZMYM2/MTMR6;<br>ZMYM2/KIAA0564;<br>ZMYM2/DMRT2;<br>TRIM28/ZBTB45                                                                                         | no             |
| TRAF3/ENSG00000259717 | mRNA-lncRNA | 14q32.32/14       | intra-chromosomal               | TRAF3 encodes for TNF receptor associated factor 3, a member of the TNF receptor associated factor (TRAF) protein family. TRAF proteins associate with, and mediate the signal transduction from members of the TNF receptor (TNFR) | long intergenic non-protein coding RNA 677                                                                                                                                                                                                                                                          | TRAF3/MYO16;<br>TRAF3/RCOR1;<br>TRAF3/SFXN1;<br>TRAF3/BMP3;<br>TRAF3/WDR20;<br>SLC22A23/TRAF3;                                                           | TRAF3/CDC42BPB |

|                      |             |                 |                   |                                                                                                                                                                                                                                                                                                                     |                                                                                                                                                                                                                                   |                                                                                                                                                                                                                                                                                                                    |               |
|----------------------|-------------|-----------------|-------------------|---------------------------------------------------------------------------------------------------------------------------------------------------------------------------------------------------------------------------------------------------------------------------------------------------------------------|-----------------------------------------------------------------------------------------------------------------------------------------------------------------------------------------------------------------------------------|--------------------------------------------------------------------------------------------------------------------------------------------------------------------------------------------------------------------------------------------------------------------------------------------------------------------|---------------|
|                      |             |                 |                   | superfamily. This protein participates in the signal transduction of CD40, a TNFR family member important for the activation of the immune response.                                                                                                                                                                |                                                                                                                                                                                                                                   |                                                                                                                                                                                                                                                                                                                    |               |
| ENSG00000259446/RYR3 | lncRNA-mRNA | 15/15q13.3-q14  | intra-chromosomal | intergenic lncRNA (lnc-FMN1-4)                                                                                                                                                                                                                                                                                      | The protein encoded by this gene is a ryanodine receptor, which functions to release calcium from intracellular storage for use in many cellular processes.                                                                       | RYR3/LARP4;<br>RYR3/BUB1B;<br>LARP4/RYR3                                                                                                                                                                                                                                                                           | no            |
| WDR90/RHOT2          | mRNA-mRNA   | 16p13.3/16p13.3 | intra-chromosomal | WDR90 encodes for WD repeat domain 90 whose function in humans is not well known. Given its broad expression in many tissues it could play a role in histone modifications, vesicular transport, or transcription regulation                                                                                        | This gene encodes a member of the Rho family of GTPase localized to the outer mitochondrial membrane and plays a role in mitochondrial trafficking and fusion-fission dynamics                                                    | WDR90/RAB40C;<br>KIAA1731/WDR90<br>; ROTH2/DPEP1                                                                                                                                                                                                                                                                   | no            |
| CLTC/RPS6KB1         | mRNA-mRNA   | 17q23.1/17q23.1 | intra-chromosomal | CLTC encodes for Clathrin heavy chain. Clathrin is the major protein component of the cytoplasmic face of intracellular organelles, called coated vesicles and coated pits. These specialized organelles are involved in the intracellular trafficking of receptors and endocytosis of a variety of macromolecules. | RPS6KB1 encodes a member of the ribosomal S6 kinase family of serine/threonine kinases. The protein responds to mTOR (mammalian target of rapamycin) signaling to promote protein synthesis, cell growth, and cell proliferation. | CLTC/FAM129C;<br>CLTC/OTOP3;<br>CLTC/CEP95;<br>CLTC/USP32;<br>CLTC/ROS1;<br>CLTC/PTRH2;<br>PTRH2/CLTC;<br>USP32/CLTC;<br>NF1/CLTC;<br>VMP1/CLTC;<br>RPS6KB1/VMP1;<br>RPS6KB1/TEX2;<br>RPS6KB1/EFCAB3<br>RPS6KB1/RNF213;<br>RPS6KB1/TUBD1;<br>DDX42/RPS6KB1;<br>C1orf132/RPS6KB1<br>BCAS3/RPS6KB1;<br>TUBD1/RPS6KB1 | RPS6KB1/VM P1 |

|                |           |                   |                             |                                                                                                                                                                                                                                                                                                                            |                                                                                                                                                                                                                                                                                                                                                                                            |                            |    |
|----------------|-----------|-------------------|-----------------------------|----------------------------------------------------------------------------------------------------------------------------------------------------------------------------------------------------------------------------------------------------------------------------------------------------------------------------|--------------------------------------------------------------------------------------------------------------------------------------------------------------------------------------------------------------------------------------------------------------------------------------------------------------------------------------------------------------------------------------------|----------------------------|----|
| ZBTB7A/MAP2K2  | mRNA-mRNA | 19p13.3/19p13.3   | intra-chromosomal           | ZBTB7A encodes for zinc finger and BTB domain containing 7A, also known as Pokemon. The protein: plays a key role in the instruction of early lymphoid progenitors to develop into B lineage by repressing T-cell instructive Notch signals; specifically represses the transcription of the CDKN2A gene                   | MAP2K2 encode s for a dual specificity protein kinase that belongs to the MAP kinase kinase family. This kinase is known to play a critical role in mitogen growth factor signal transduction. It phosphorylates and thus activates MAPK1/ERK2 and MAPK2/ERK3.                                                                                                                             | ZBTB7A/TNK1; MAP2K2/CAMKK1 | no |
| TPTE/BAGE2     | mRNA-mRNA | 21p11.2/21p11.2   | intra-chromosomal           | TPTE encodes for a transmembrane phosphatase with tensin homology, a PTEN-related tyrosine phosphatase which may play a role in the signal transduction pathways of the endocrine or spermatogenic function of the testis.                                                                                                 | B melanoma antigen family member 2                                                                                                                                                                                                                                                                                                                                                         | no                         | no |
| IGLV1-40/IGLL5 | mRNA-mRNA | 22q11.22/22q11.21 | Intra-chromosomal Inversion | IGLV1-40 encodes for immunoglobulin lambda variable 1-40                                                                                                                                                                                                                                                                   | IGLL5 encodes one of the immunoglobulin lambda-like polypeptides. It is located within the immunoglobulin lambda locus but it does not require somatic rearrangement for expression. The first exon of this gene is unrelated to immunoglobulin variable genes; the second and third exons are the immunoglobulin lambda joining 1 and the immunoglobulin lambda constant 1 gene segments. | no                         | no |
| BMS1P20/IGLL5  | mRNA-mRNA | 22q11.21/22q11.21 | intra-chromosomal           | BMS1P20 encodes for BMS1, ribosome biogenesis factor pseudogene 20. This locus appears to be a transcribed pseudogene of the BMS1 homolog of yeast ribosome assembly protein on chromosome 10 that has arisen from duplication of the 3' half of the parent gene. This gene lies in the immunoglobulin lambda gene cluster |                                                                                                                                                                                                                                                                                                                                                                                            | no                         | no |

|                     |             |                   |                   |                                                                                                                                                                                                                                                         |                                                                                                                                                                                                                                                                                                                                                                                                 |                                                                                                                           |    |
|---------------------|-------------|-------------------|-------------------|---------------------------------------------------------------------------------------------------------------------------------------------------------------------------------------------------------------------------------------------------------|-------------------------------------------------------------------------------------------------------------------------------------------------------------------------------------------------------------------------------------------------------------------------------------------------------------------------------------------------------------------------------------------------|---------------------------------------------------------------------------------------------------------------------------|----|
| PI4KA/CRKL          | mRNA-mRNA   | 22q11.21/22q11.21 | intra-chromosomal | This gene encodes a phosphatidylinositol (PI) 4-kinase which catalyzes the first committed step in the biosynthesis of phosphatidylinositol 4,5-bisphosphate. The protein encoded by this gene is a type III enzyme that is not inhibited by adenosine. | This gene encodes a protein kinase containing SH2 and SH3 (src homology) domains which has been shown to activate the RAS and JUN kinase signaling pathways and transform fibroblasts in a RAS-dependent fashion. It is a substrate of the BCR-ABL tyrosine kinase, plays a role in fibroblast transformation by BCR-ABL, and may be oncogenic                                                  | PI4KA/FAM19A5; PI4KA/SNAP29; PI4KA/ZNF274; PI4KA/RREB1; PI4KA/PRODH; PI4KA/FAM175A; PI4KA/DEPDC5; MED15/PI4KA; DGCR8/CRKL | no |
| ENSG00000231669/MSN | lncRNA-mRNA | X/Xq12            | intra-chromosomal | intergenic lncRNA (lnc-MSN-1)                                                                                                                                                                                                                           | MSN encodes for moesin (membrane-organizing extension spike protein), a member of the ERM family which includes ezrin and radixin. ERM proteins appear to function as cross-linkers between plasma membranes and actin-based cytoskeletons. Moesin is localized to filopodia and other membranous protrusions that are important for cell-cell recognition and signaling and for cell movement. | MSN/MLRC4; MSN/HTR3D                                                                                                      | no |

§ according to the TCGA database: <http://54.84.12.177/PanCanFusV2/>
